# Supplementary material for: “Pharaoh’s Snakes” Reaction-Derived Carbon with Favorable Structure and Composition as Metal-Free Oxygen Reduction Reaction Electrocatalyst
Source: MDPI journal article supplement (doi:10.3390/catal13071059), 2023-06-30
Supplement: s1 [file s1]

Supplementary Materials

# **“Pharaoh’s snakes” reaction-derived carbon with favorable structure and composition as metal-free oxygen reduction reaction electrocatalyst**

Yuan Li<sup>1</sup>, Xinyao Wang<sup>1</sup>, Hong Wang<sup>1</sup>, Xiaoyao Tan<sup>1</sup>, Dan Liu<sup>1,2</sup>, Jianzhou Gui<sup>1</sup>, Jian Gao<sup>1,3\*</sup>, Zhen Yin<sup>3,4</sup>, Na Ma<sup>4\*</sup> and Yun Wang<sup>5\*</sup>.

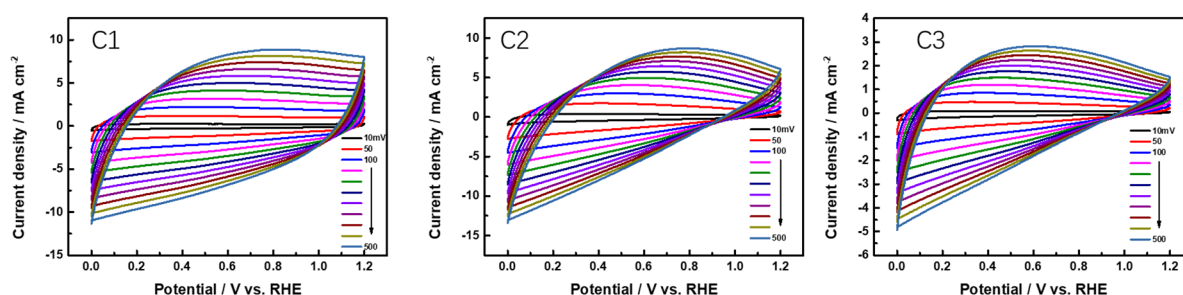

Figure S1. CV curves of C<sub>1</sub>, C<sub>2</sub> and C<sub>3</sub>.

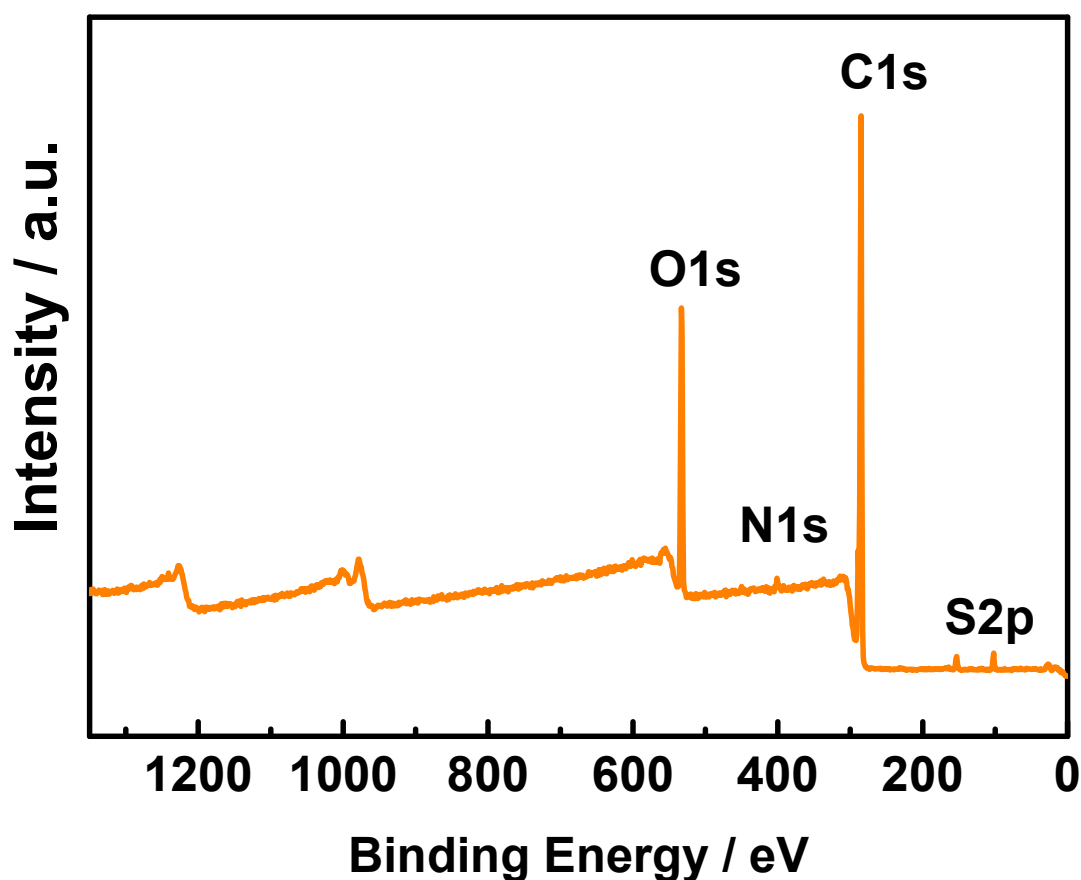

Figure S2. XPS spectra of C<sub>1</sub>.

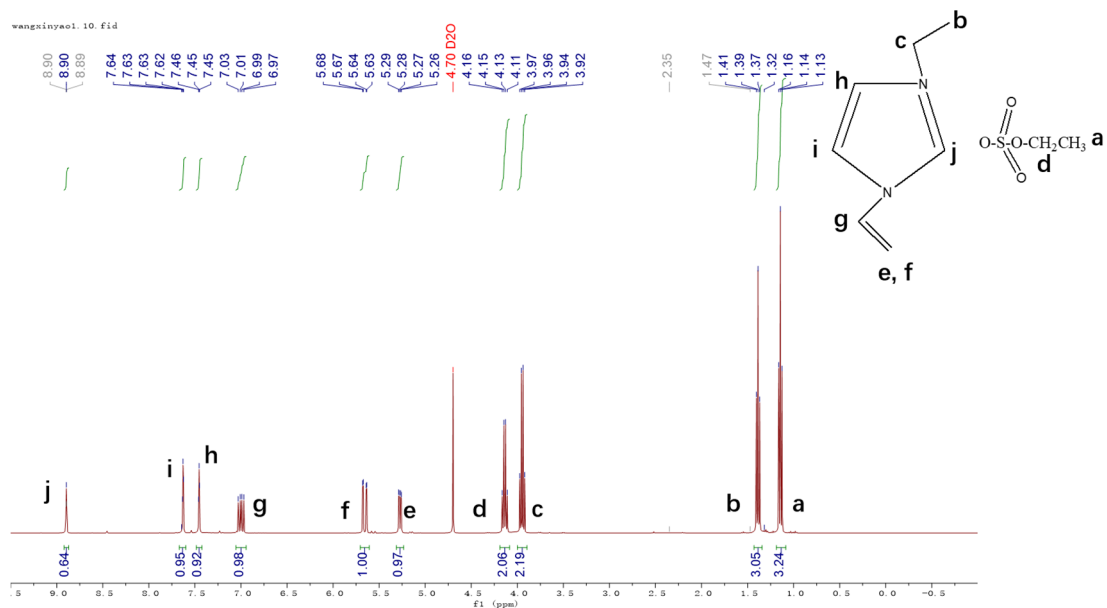

**Figure S3.**  $^1\text{H}$  NMR with  $\text{D}_2\text{O}$  as the solvent.

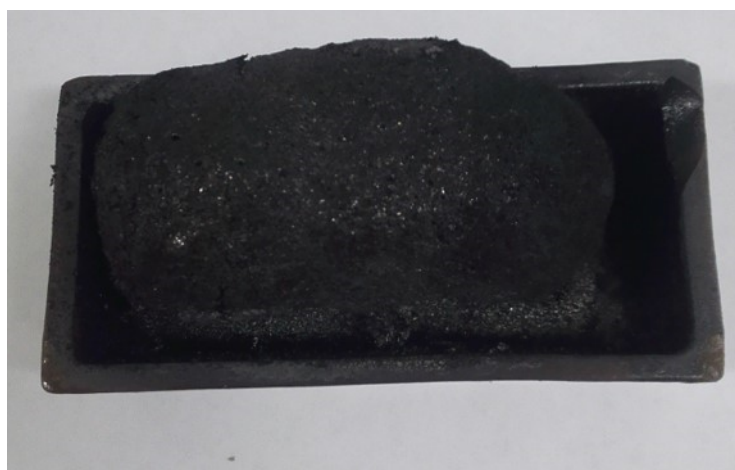

**Figure S4.** Picture of the prepared carbon from sugar powder,  $\text{NH}_4\text{HCO}_3$ , melamine and ionic liquid of  $[\text{Etvim}]\text{EtSO}_4$ .

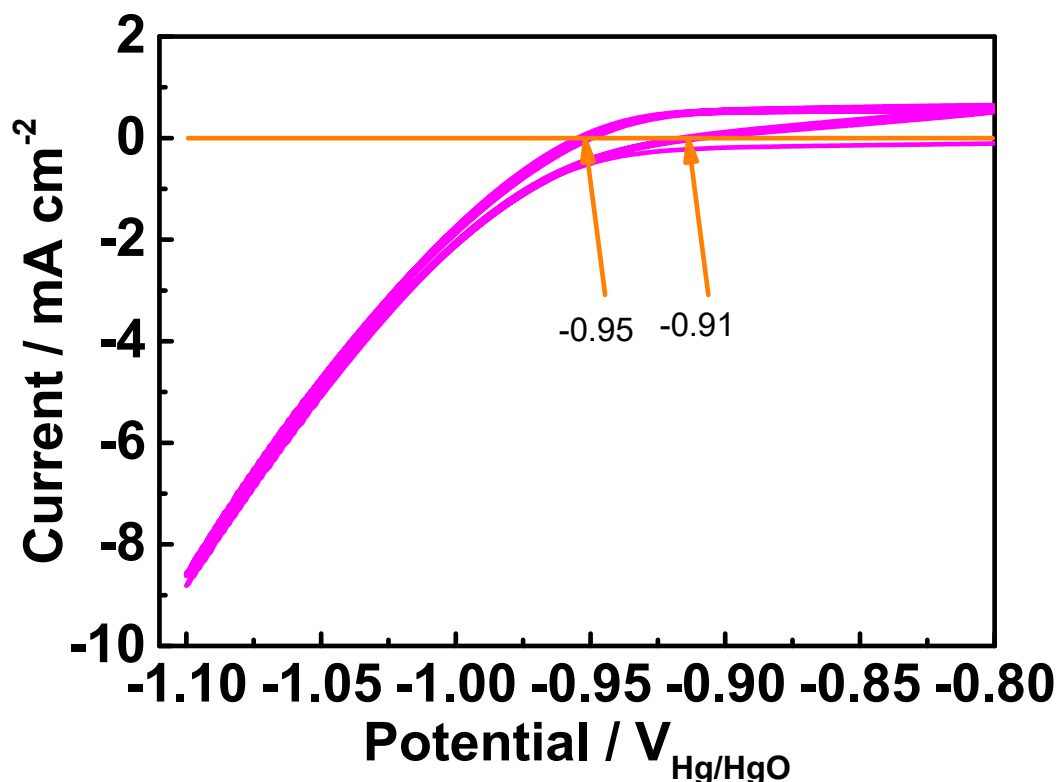

**Figure S5.** CV curves for the calibration of Hg/HgO reference electrode.

The potential of Hg/HgO can be determined based on the pH using calculations. Alternatively, it can be measured using a method described elsewhere, with some modifications or adjustments as needed [1]. The calibration of Hg/HgO reference electrode is performed in a standard three-electrode system with polished Pt wires as the working and counter electrodes. Electrolytes are pre-purged and saturated with high purity H<sub>2</sub>. Cyclic voltammetry (CV) is then run at a scan rate of 0.1 mV s<sup>-1</sup>. And the average potential at which the current crossed zero is taken to be the thermodynamic potential (*vs.* Hg/HgO) for the hydrogen electrode reactions. For example, in 0.1 M KOH, the zero current point is at -0.95 and -0.91 V as shown in Figure R3, so  $E_{\text{RHE}} = E_{\text{Hg/HgO}} + 0.93$  V. The converting method is added into the revised manuscript.

#### Reference:

- [1] Y. G. Li, W. Zhou, H. L. Wang, L. M. Xie, Y. Y. Liang, F. Wei, J. C. Idrobo, S. J. Pennycook, H. J. Dai, An oxygen reduction electrocatalyst based on carbon nanotube-graphene complexes, *Nat. Nanotechnol.* 2012, 7, 394-400.
